# Supplementary material for: Single-species dinoflagellate cyst carbon isotope fractionation in core-top sediments: environmental controls, CO 2 dependency and proxy potential
Source: Copernicus journal article supplement (doi:10.5194/bg-20-4651-2023), 2023-11-27
Supplement: Supplementary file 1 [file bg-20-4651-2023-supplement.pdf]

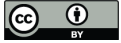

*Supplement of*

## **Single-species dinoflagellate cyst carbon isotope fractionation in core-top sediments: environmental controls, CO<sub>2</sub> dependency and proxy potential**

**Joost Frieling et al.**

*Correspondence to:* Joost Frieling ([joost.frieling@earth.ox.ac.uk](mailto:joost.frieling@earth.ox.ac.uk))

The copyright of individual parts of the supplement might differ from the article licence.

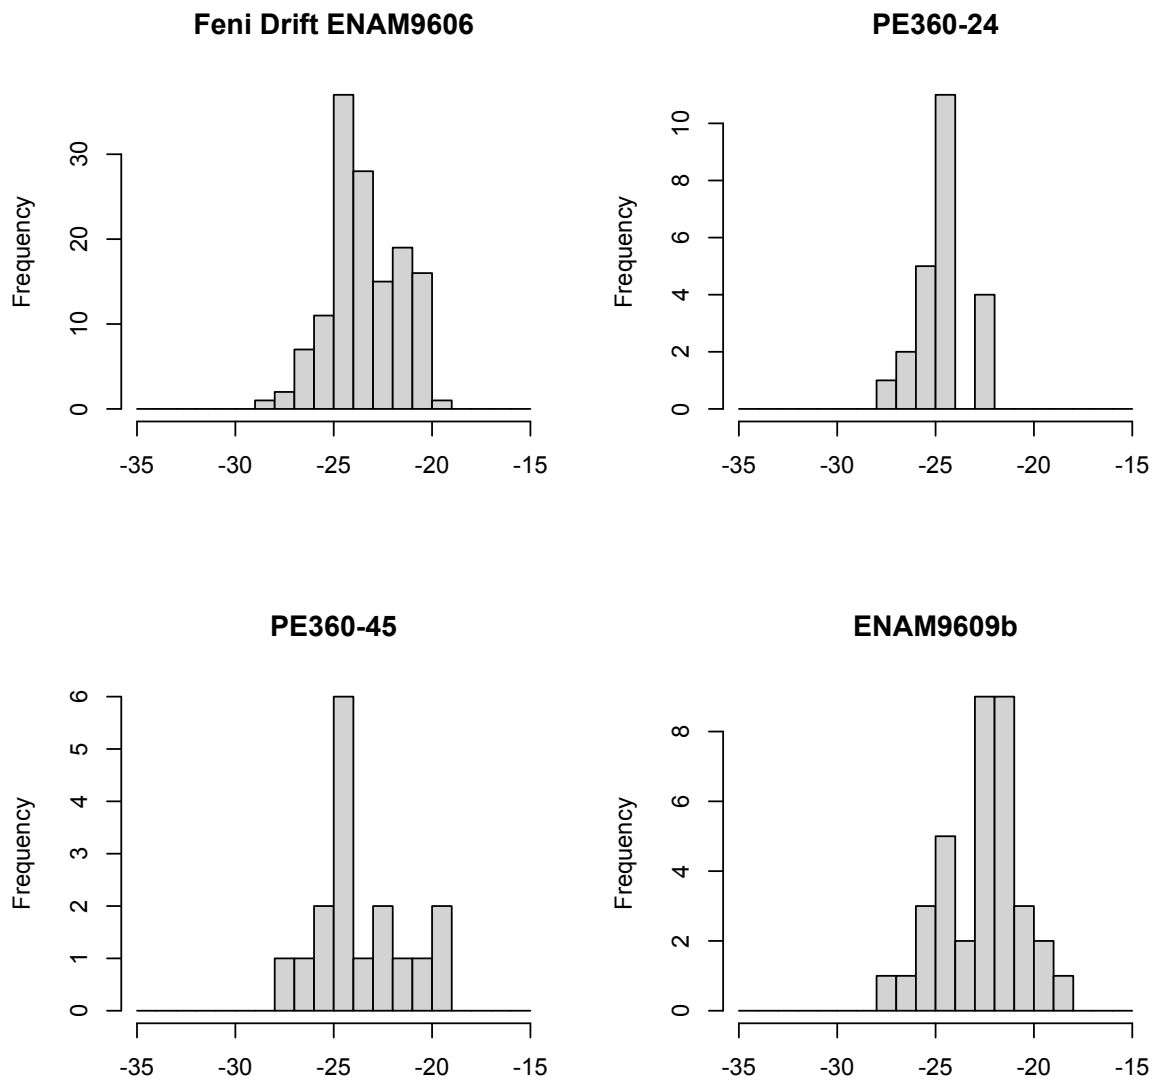

**Figure S1. Histograms of down-core  $\delta^{13}\text{C}_{\text{DINO}}$  (*O. centrocarpum*) for ENAM9606 in the North Atlantic compared to three nearby core-top samples (PE360-24, PE360-45, ENAM9609b). ENAM9606 (55.650 °N, -13.985 °E) represents down-core  $\delta^{13}\text{C}_{\text{DINO}}$  for ~0 – 1500 CE (Richter et al., 2009), whereas PE360-24 (55.496 °N, -15.801 °E), PE360-45 (55.539 °N, -15.845 °E) and ENAM9609b (57.160 °N, -10.26°E) represent nearby core-top  $\delta^{13}\text{C}_{\text{DINO}}$ . Frequency (y-axis) indicates the number of measurements for each of the 1‰-wide  $\delta^{13}\text{C}$  bins. All  $\delta^{13}\text{C}$  distributions are background-corrected values, without outliers.**
